# Supplementary material for: Assays to Detect β-Tubulin Codon 200 Polymorphism in Trichuris trichiura and Ascaris lumbricoides
Source: PubMed Central journal article supplement (PMC2654341; doi:10.1371/journal.pntd.0000397), 2009-03-24
Supplement: pntd.0000397.s001.pdf [file pntd.0000397.s001.pdf]

# Alignment of beta tubulin cDNA sequences from 11 nematodes

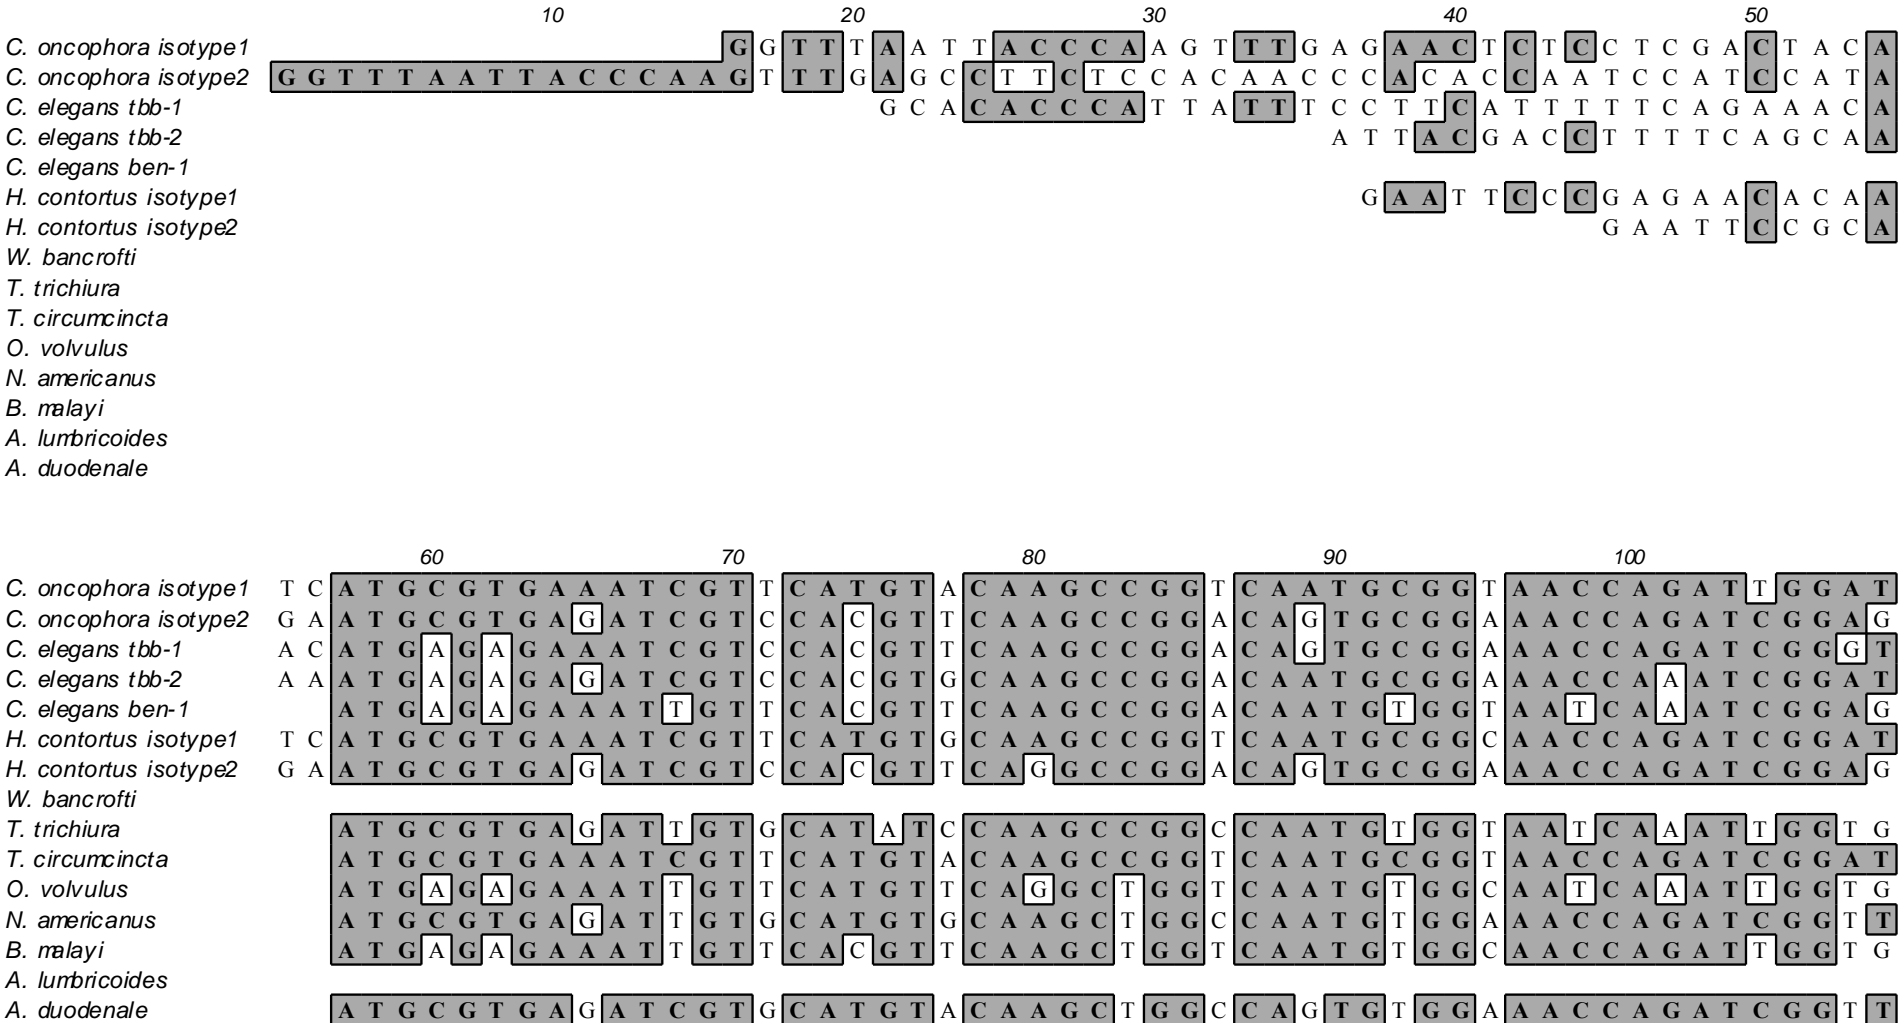

110 120 130 140 150 160

*C. oncophora isotype1* C A A A G T T C T G G G A A G T G A T C T C C G A T G A A C A C G G T A T C C A A C C C G A T G G A A C A T

*C. oncophora isotype2* C A A A G T T C T G G G A G G T T A T C T C T G A C G A A C A C G G C A T C C A G C C C G A T G G A T C A T

*C. elegans tbb-1* C C A A G T T C T G G G A A G T C A T C T C C G A T G A G C A C G G A A T C C A G C C C G A T G G A A C C T

*C. elegans tbb-2* C C A A A T T T C T G G G A G G T C A T C T C C G A C G A G C A C G G A A T C C A G C C A G A C G G A A C C T

*C. elegans ben-1* C C A A G T T C T G G G A A G T G A T A T C C G A T G A G C A T G G G A T C C A G C C T G A T G G A A C T T

*H. contortus isotype1* C A A A G T T C T G G G A A G T G A T C T C T G A T G A G C A C G G T A T C C A G C C C G A T G G A A C A T

*H. contortus isotype2* C C A A G T T C T G G G A G G T T A T C T C T G A C G A G C A T G G C A T C C A A C C C G A T G G A T C A T

*W. bancrofti*

*T. trichiura* C G A A G T T C T G G G A A G T C A T C T C G G A T G A A C A T G G T A T C G A T C C C A C A G G A A C T T

*T. circumcincta* C A A A G T T C T G G G A A G T G A T C T C T G A T G A G C A C G G T A T C C A G C C C G A T G G A A C T T

*O. volvulus* C C A A G T T C T G G G A A G T A A T A T C G G A T G A A C A T G G C A T T C A A C C T T G A T G G T A C T T

*N. americanus* C A A A G T T C T G G G A A G T G A T C T C T G A C G A A C A T G G T A T C A A G C C T G A T G G C A C A T

*B. malayi* C C A A G T T C T G G G A A G T A A T A T C G G A T G A A C A T G G T G T T C A A C C T G A T G G T A C A T

*A. lumbricoides*

*A. duodenale* C A A A G T T C T G G G A A G T G A T C T C T G A T G A G C A C G G C A T C A A G C C T G A C G G C A C C T

170 180 190 200 210

*C. oncophora isotype1* A C A A A G G A G A A T C A G A C C T G C A A G T T A G A G A G A A T C A A T G T T T A C T A C A A T G A A G

*C. oncophora isotype2* A C A A A G G A G A A T C A G T G A T C T T C A A T T A G A A C G A A T C A A T G T G T A C T A C A A C G A A G

*C. elegans tbb-1* T C A A G G G A G A A G C T G A T C T C C A A G C T G G A G A G A A T C G A T G T C T A C T A C A A C G A G G

*C. elegans tbb-2* T C A A G G G A G A G A C G G A T C T C C A G C T T G A G C G C A T T G A C G T C T A C T A C A A C G A A G

*C. elegans ben-1* A T A A G G G A G A A G T G A T T T G C A A G T T G G A A G A A T C A A T G T C T A C T A T A A T G A G G

*H. contortus isotype1* A C A A A G G A G A A T C A G A T C T G C A A T T A G A A A G G A T C A A T G T G T A C T A C A A T G A A G

*H. contortus isotype2* A C A A A G G A G A G A G C G A T C T A C A A C T A G A A C G A A T C A A T G T T T A C T A C A A T G A G G

*W. bancrofti*

*T. trichiura* A C C A C G G T G A C T C G G A C C T G C A A C T T G A A C G C A T A A A T G T T T A C T A C A A C G A A G

*T. circumcincta* A C A A A G G A G A A T C G G C A C T G C A A T T A G A A A G A A T C A A T G T A T A C T A C A A T G A G G

*O. volvulus* A T A A A G G T G A T T C A G A T T T G C A A A T T G A G C G A A T C A A T G T C T A C T A T A A T G A A G

*N. americanus* A C A G T G G C G A G T C T G A T T T G C A G C T T G A G C G A A T C A A T G T A T A C T A T A A C G A A G

*B. malayi* A C A A A G G T G A T T C A G A C T T G C A A A T T G A A C G A A T C A A C G T C T A C T A T A A T G A A G

*A. lumbricoides*

*A. duodenale* A C A G T G G T G A A T C T G A T C T G C A A C T T G A A C G A A T C A A C G T G T A C T A T A A T G A A G

220 230 240 250 260 270  
*C. oncophora isotype1* C A C A T G G A G G C A A A T A T G T C C C A C G T G C T G T A C T T G T T G A T C T C G A G C C C G G A A  
*C. oncophora isotype2* C T A A T G G A G G A A A A T A T G T T C C A C G A G C A G T A C T T G T T G A C T T G G A A C C T G G A A  
*C. elegans tbb-1* C C A A C A A T G G C A A A T A C G T T C C A C G T G C A G T C C T C G T T G A T C T C G A G C C A G G A A  
*C. elegans tbb-2* C C A A C A A C G G A A A G T A T G T G C C A C G C G C C G T G T T G G T C G A T C T C G A A C C A G G A A  
*C. elegans ben-1* C T A A T G G C G G C A A A T A T G T C C C A C G C G C T G T T C T C G T C G A T C T T G A G C C A G G A A  
*H. contortus isotype1* C A C A T G G A G G C A A G T A T G T T C C A C G T G C T G T T C T T G T T G A T C T C G A G C C T G G A A  
*H. contortus isotype2* C T A A T G G A G G A A A G T A T G T T C C A C G G G C G G T A C T T G T T G A T C T G G A A C C C G G C A  
*W. bancrofti* C T T C T G G T G G C G A A T A C G T T C C T A G G G C C A T A C T T G T T G A C C T C G A G C C T G G T A  
*T. trichiura* C A C A T G G A G G C A A A T A T G T C C C A C G T G C T G T T C T T G T T G A T C T C G A G C C C G G A A  
*T. circumcincta* C G A A T G G T G G C A A A T A T G T A C C A C G A G C A A T C C T T G T C G A T C T G G A A C C G G G T A  
*O. volvulus* C C C A C G G A G G A A A G T A T G T G C C T C G T G C A G T T C T T G T T G A T C T C G A A C C C G G A A  
*N. americanus* C G A A T G G G G G C A A A T A T G T G C C A C G A G C A G T C C T T G T T G A T C T C G A A C C A G G T A  
*B. malayi* C A C A T G G A G G A A A A T A T G T C C C A C G T G C A G T T C T T G T T G A T C T C G A A C C C G G A A  
*A. lumbricoides* C A C A T G G A G G A A A A T A T G T C C C A C G T G C A G T T C T T G T T G A T C T C G A A C C C G G A A  
*A. duodenale* C A C A T G G A G G A A A A T A T G T C C C A C G T G C A G T T C T T G T T G A T C T C G A A C C C G G A A

280 290 300 310 320  
*C. oncophora isotype1* C A A T G G A T T C T G T T C G T T C T G G A C C A T A T G G A C A A C T A T T C C G T C C A G A T A A T T  
*C. oncophora isotype2* C G A T G G A C T C T G T T C G A T C A G G A C C T T T C G G A G C T T T A T T C C G T C C C G A C A A C T  
*C. elegans tbb-1* C G A T G G A T T C T G T G C G G T C C G G T C C T T T C G G A C A A C T C T T C A G A C C A G A C A A C T  
*C. elegans tbb-2* C C A T G G A T T C T G T C C G C T C T G G A C C A T T C G G C C A G C T G T T C C G T C C T G A C A A C T  
*C. elegans ben-1* C C A T G G A T T C T G T C C G C T C T G G A C C A T T C G G C C A G C T G T T C C G T C C A G A T A A C T  
*H. contortus isotype1* C G A T G G A C T C C T T T C G T T C T G G A C C G T A T G G A C A G C T T T T C C G T C C A G A T A A T T  
*H. contortus isotype2* C G A T G G A C T C A G T T C G C T C C G G A C C T T T T G G T G C T C T A T T C C G C C C G G A C A A C T  
*W. bancrofti* C C A T G G A T T C T A T T C G A G G A G G T G A G T T C G G A C A A C T A T T T C G A C C G G A T A A T T  
*T. trichiura* C T A T G G A C A G T G T G C G C G C A G G T C C G T T C G G A A C A C T T T T T C G A C C A G A T A G T T  
*T. circumcincta* C A A T G G A C T C T G T T C G T T C T G G A C C G T A T G G A C A A C T T T T C C G T C C A G A T A A T T  
*O. volvulus* C T A T G G A T T C C A T T C G A G G A G G T G G A T T T G G C C A A C T G T T C C G A C C G G A C A A T T  
*N. americanus* C G A T G G A C T C G G T C T C T G G G C C A T A C G G G C A G C T G T T C C G A C C T G A T A A C T  
*B. malayi* C A T G G A T T C T A T T C G A G G A G G T G A G T T C G G G C A A C T A T T C C G A C C T G A C A A T T  
*A. lumbricoides* A T G G A C T C A A T C C G C G G G G G T G C T T T C G G A C A G C T C T T T C G T C C G G A T A A T T  
*A. duodenale* C A A T G G A C T C G G T C C G T T C T G G G C C A T A C G G G C A A T T G T T C C G C C C T G A T A A C T

|                              | 330       | 340                     | 350               | 360                     | 370                               |
|------------------------------|-----------|-------------------------|-------------------|-------------------------|-----------------------------------|
| <i>C. oncophora isotype1</i> | A C G T G | T T T G G C C A G T C A | G G A G C G G G T | A A C A A C T G G G C A | A A G G G C C A C T A T A C C G   |
| <i>C. oncophora isotype2</i> | T T G T C | T T T G G A C A G T C T | G G A G C A G G A | A A T A A C T G G G C G | A A G G G A C A C T A C A C A G   |
| <i>C. elegans tbb-1</i>      | T T G T T | T T C G G A C A A T C T | G G A G C T G G A | A A C A A T T G G G C C | A A G G G A C A T T A C A C C G   |
| <i>C. elegans tbb-2</i>      | T T G T G | T T C G G A C A A A G C | G G A G C C G G A | A A C A A C T G G G C C | A A G G G T C A C T A C A C A G   |
| <i>C. elegans ben-1</i>      | T T G T G | T T C G G A C A A T C C | G G A G C C G G A | A A C A A C T G G G C C | A A G G G T C A C T A C A C C G   |
| <i>H. contortus isotype1</i> | A C G T G | T T T G G C C A G T C A | G G A G C G G G T | A A C A A T T G G G C G | A A G G G C C A C T A T A C T G   |
| <i>H. contortus isotype2</i> | T T G T C | T T C G G G C A A T C T | G G A G C C G G T | A A T A A C T G G G C A | A A A G G T C A C T A C A C A G   |
| <i>W. bancrofti</i>          | T T G T T | T T T G G A C A A A G T | G G A G C T G G C | A A C A A C T G G G C T | A A G G G A C A T T A T A C G G   |
| <i>T. trichiura</i>          | T T A T T | T T T G G G C A A A G T | G G C G C         | A A T A A T T G G G C T | A A A G G G C C A C T A T A C G G |
| <i>T. circumcincta</i>       | A C G T G | T T T G G C C A G T C A | G G A G C G G G T | A A C A A C T G G G C G | A A G G G C C A C T A T A C C G   |
| <i>O. volvulus</i>           | T T G T A | T T T G G A C A A A G T | G G A G C T A G C | A A C A A T T G G G C T | A A G G G A C A T T A C A C G G   |
| <i>N. americanus</i>         | A C G T G | T T T G G A C A G T C T | G G T G C T G G A | A A T A A T T G G G C G | A A G G G G C A C T A C A C T G   |
| <i>B. malayi</i>             | T T G T T | T T T G G A C A A A G T | G G A G C T G G C | A A C A A C T G G G C T | A A G G G A C A T T A T A C G G   |
| <i>A. lumbricoides</i>       | T C G T T | T T C G G C C A A A G T | G G A G C G G G A | A A C A A C T G G G C G | A A G G G C C A T T A T A C G G   |
| <i>A. duodenale</i>          | A C G T G | T T T G G A C A G T C C | G G T G C A G G A | A A C A A C T G G G C A | A A G G G A C A C T A C A C G     |

|                              | 380             | 390               | 400                           | 410                             | 420                       | 430     |
|------------------------------|-----------------|-------------------|-------------------------------|---------------------------------|---------------------------|---------|
| <i>C. oncophora isotype1</i> | A G G G A G C T | G A A C T C G T C | G A C A A T G T C C T A       | G A T G T T G T T C G T         | A A A G A G G C T G A G G | A A G G |
| <i>C. oncophora isotype2</i> | A A G G A G C T | G A A C T T G T C | G A T A G C G T C T T G       | G A T G T C G T T C G C A A G   | G A G G C A G A A G       | A A G G |
| <i>C. elegans tbb-1</i>      | A G G G A G C A | G A A C T T G T T | G A C A A C G T G C T C       | G A T G T G A T C C G C A A G   | A G G C T G A A G         | A A G G |
| <i>C. elegans tbb-2</i>      | A A G G A G C T | G A G C T T G T C | G A C A A T G T G C T T       | G A C G T G A T C C G C A A G   | G A A G C C G A A G       | A A G G |
| <i>C. elegans ben-1</i>      | A A G G A G C C | G A A C T T G T C | G A T A A T G T G C T C       | G A C G T A G T T C G A A A G   | A G G C T G A A G         | A A G G |
| <i>H. contortus isotype1</i> | A G G G A G C C | G A G C T A G T T | G A T A A C G T A T T A       | G A C G T T G T C C G C A A A G | A A G A G C T G A A G     | A A G G |
| <i>H. contortus isotype2</i> | A A G G A G C T | G A A C T T G T T | G A T A G T G T C C T T       | G A T G T T G T T C G C A A A G | A G G C A G A A G         | A A G G |
| <i>W. bancrofti</i>          | A A G G T G C G | G A A C T A G T T | G A T A A T G T G T T G       | G A C G T G A T A C G A A A A G | A G G C T G A A G         | A A G G |
| <i>T. trichiura</i>          | A A G G T G C C | G A A C T A G T T | G A C A A T G T G C T T       | G A T G T A G T C C G C A A G   | G A A T C G G A A A       | A A G G |
| <i>T. circumcincta</i>       | A G G G A G C T | G A G C T T G T T | G A C A A C G T C T T A       | G A T G T T G T T C G T A A A G | A G G C A G A A G         | A A G G |
| <i>O. volvulus</i>           | A A G G T G C A | G A A T T G G T T | G A T A A T G T A T T G       | G A T G T A A T A C G A A A A G | A G G C T G A A G         | A A G G |
| <i>N. americanus</i>         | A A G G A G C T | G A G C T A G T C | G A T A A T G T T C T T       | G A T G T A G T T C G C A A A G | A A G A A G C T G A A G   | A A G G |
| <i>B. malayi</i>             | A A G G T G C G | G A A C T A G T T | G A T A A T G T G T T G       | G A C G T G A T A C G A A A A G | A A G A A G C T G A A G   | A A G G |
| <i>A. lumbricoides</i>       | A G G G T G C A | G A G T T G       | G T C G A T A A T G T G C T C | G A T G T G A T T C G C A A A G | A G G C C G A A G         | A A G G |
| <i>A. duodenale</i>          | A A G G A G C T | G A G C T C G T C | G A T A A C G T C C T T       | G A T G T A G T T C G C A A A G | A G G C G G A A G         | A A G G |

|                              | 330       | 340                     | 350               | 360                     | 370                               |
|------------------------------|-----------|-------------------------|-------------------|-------------------------|-----------------------------------|
| <i>C. oncophora isotype1</i> | A C G T G | T T T G G C C A G T C A | G G A G C G G G T | A A C A A C T G G G C A | A A G G G C C A C T A T A C C G   |
| <i>C. oncophora isotype2</i> | T T G T C | T T T G G A C A G T C T | G G A G C A G G A | A A T A A C T G G G C G | A A G G G A C A C T A C A C A G   |
| <i>C. elegans tbb-1</i>      | T T G T T | T T C G G A C A A T C T | G G A G C T G G A | A A C A A T T G G G C C | A A G G G A C A T T A C A C C G   |
| <i>C. elegans tbb-2</i>      | T T G T G | T T C G G A C A A A G C | G G A G C C G G A | A A C A A C T G G G C C | A A G G G T C A C T A C A C A G   |
| <i>C. elegans ben-1</i>      | T T G T G | T T C G G A C A A T C C | G G A G C C G G A | A A C A A C T G G G C C | A A G G G T C A C T A C A C C G   |
| <i>H. contortus isotype1</i> | A C G T G | T T T G G C C A G T C A | G G A G C G G G T | A A C A A T T G G G C G | A A G G G C C A C T A T A C T G   |
| <i>H. contortus isotype2</i> | T T G T C | T T C G G G C A A T C T | G G A G C C G G T | A A T A A C T G G G C A | A A A G G T C A C T A C A C A G   |
| <i>W. bancrofti</i>          | T T G T T | T T T G G A C A A A G T | G G A G C T G G C | A A C A A C T G G G C T | A A G G G A C A T T A T A C G G   |
| <i>T. trichiura</i>          | T T A T T | T T T G G G C A A A G T | G G C G C         | A A T A A T T G G G C T | A A A G G G C C A C T A T A C G G |
| <i>T. circumcincta</i>       | A C G T G | T T T G G C C A G T C A | G G A G C G G G T | A A C A A C T G G G C G | A A G G G C C A C T A T A C C G   |
| <i>O. volvulus</i>           | T T G T A | T T T G G A C A A A G T | G G A G C T A G C | A A C A A T T G G G C T | A A G G G A C A T T A C A C G G   |
| <i>N. americanus</i>         | A C G T G | T T T G G A C A G T C T | G G T G C T G G A | A A T A A T T G G G C G | A A G G G G C A C T A C A C T G   |
| <i>B. malayi</i>             | T T G T T | T T T G G A C A A A G T | G G A G C T G G C | A A C A A C T G G G C T | A A G G G A C A T T A T A C G G   |
| <i>A. lumbricoides</i>       | T C G T T | T T C G G C C A A A G T | G G A G C G G G A | A A C A A C T G G G C G | A A G G G C C A T T A T A C G G   |
| <i>A. duodenale</i>          | A C G T G | T T T G G A C A G T C C | G G T G C A G G A | A A C A A C T G G G C A | A A G G G A C A C T A C A C G     |

|                              | 380             | 390               | 400                     | 410                             | 420                       | 430       |
|------------------------------|-----------------|-------------------|-------------------------|---------------------------------|---------------------------|-----------|
| <i>C. oncophora isotype1</i> | A G G G A G C T | G A A C T C G T C | G A C A A T G T C C T A | G A T G T T G T T C G T         | A A A G A G G C T G A G G | A G G     |
| <i>C. oncophora isotype2</i> | A A G G A G C T | G A A C T T G T C | G A T A G C G T C T T G | G A T G T C G T T C G C A A G   | G A G G C A G A A G       | A G A A G |
| <i>C. elegans tbb-1</i>      | A G G G A G C A | G A A C T T G T T | G A C A A C G T G C T C | G A T G T G A T C C G C A A G   | A G G C T G A A G         | A G A A G |
| <i>C. elegans tbb-2</i>      | A A G G A G C T | G A G C T T G T C | G A C A A T G T G C T T | G A C G T G A T C C G C A A G   | G A A G C G A A G         | A G A A G |
| <i>C. elegans ben-1</i>      | A A G G A G C C | G A A C T T G T C | G A T A A T G T G C T C | G A C G T A G T T C G A A A G   | A G G C T G A A G         | A G A A G |
| <i>H. contortus isotype1</i> | A G G G A G C C | G A G C T A G T T | G A T A A C G T A T T A | G A C G T T G T C C G C A A A G | A A G C T G A A G         | A G A A G |
| <i>H. contortus isotype2</i> | A A G G A G C T | G A A C T T G T T | G A T A G T G T C C T T | G A T G T T G T T C G C A A A G | A G G C A G A A G         | A G A A G |
| <i>W. bancrofti</i>          | A A G G T G C G | G A A C T A G T T | G A T A A T G T G T T G | G A C G T G A T A C G A A A A G | A G G C T G A A G         | A G A A G |
| <i>T. trichiura</i>          | A A G G T G C C | G A A C T A G T T | G A C A A T G T G C T T | G A T G T A G T C C G C A A G   | G A A T C G G A A A       | A G A A A |
| <i>T. circumcincta</i>       | A G G G A G C T | G A G C T T G T T | G A C A A C G T C T T A | G A T G T T G T T C G T A A A G | A G G C A G A A G         | A G A G G |
| <i>O. volvulus</i>           | A A G G T G C A | G A A T T G G T T | G A T A A T G T A T T G | G A T G T A A T A C G A A A A G | A G G C T G A A G         | A G A A G |
| <i>N. americanus</i>         | A A G G A G C T | G A G C T A G T C | G A T A A T G T T C T T | G A T G T A G T T C G C A A A G | A A G C T G A A G         | A G A A G |
| <i>B. malayi</i>             | A A G G T G C G | G A A C T A G T T | G A T A A T G T G T T G | G A C G T G A T A C G A A A A G | A A G C T G A A G         | A G A A G |
| <i>A. lumbricoides</i>       | A G G G T G C A | G A G T T G G T C | G A T A A T G T G C T C | G A T G T G A T T C G C A A A G | A G G C C G A A G         | A G A G G |
| <i>A. duodenale</i>          | A A G G A G C T | G A G C T C G T C | G A T A A C G T C C T T | G A T G T A G T T C G C A A A G | A G G C G G A A G         | A G A A G |

|                              | 440                                     | 450                                 | 460                     | 470       | 480 |
|------------------------------|-----------------------------------------|-------------------------------------|-------------------------|-----------|-----|
| <i>C. oncophora isotype1</i> | G C T G C G A T T G C C T T C A G G G C | T T C C A A C T T A C G C A T T C T | C T T G G A G G A G G T | A C C G   |     |
| <i>C. oncophora isotype2</i> | G A T G C G A T T G C C T T C A G G G T | T T C C C A C T C A C G C A C T C G | C T T G G A G G A G G C | A C C T G |     |
| <i>C. elegans tbb-1</i>      | G A T G C G A T T G T C T T C A A G G A | T T C C A G C T C A C A C A C T C T | C T T G G A G G T G G A | A C C G   |     |
| <i>C. elegans tbb-2</i>      | G A T G C G A T T G T C T T C A A G G A | T T C C A A C T C A C T C A C T C T | C T C G G A G G A G G A | A C C G   |     |
| <i>C. elegans ben-1</i>      | G A T G T G A T T G T C T T C A A G G A | T T C C A G T T G A C T C A T T C A | C T T G G A G G A G G A | A C C T G |     |
| <i>H. contortus isotype1</i> | G T T G T G A T T G C C T T C A G G G C | T T C C A A T T G A C G C A T T C A | C T T G G A G G A G G C | A C C T G |     |
| <i>H. contortus isotype2</i> | G G T G C G A T T G T C T T C A G G G T | T T C C A A C T C A C G C A C T C G | C T T G G A G G A G G C | A C C A G |     |
| <i>W. bancrofti</i>          | G A T G C G A T T G T C T T C A G G G A | T T T C A A C T A A C G C A T T C A | C T T G G T G G C G G T | A C C G   |     |
| <i>T. trichiura</i>          | G C T G C G A C T G C C T G C A A G G G | T T T C A G T T G A C T C A T T C C | C T C G G C G G C G G A | A C C T G |     |
| <i>T. circumcincta</i>       | G T T G C G A T T G C C T T C A G G G C | T T C C A A C T G A C G C A T T C T | T T G G G A G G A G G T | A C C T G |     |
| <i>O. volvulus</i>           | G A T G C G A C T G T C T T C A G G G A | T T T C A A T T G A C T C A T T C A | C T T G G C G G T G G T | A C C G   |     |
| <i>N. americanus</i>         | G A T G T G A C T G T C T C A G G G C   | T T C C A A T T G A C C C A C T C T | C T T G G A G G A G G T | A C C G   |     |
| <i>B. malayi</i>             | G A T G C G A T T G T C T T C A G G G A | T T T C A A C T A A C G C A T T C A | C T T G G T G G T G G T | A C C G   |     |
| <i>A. lumbricoides</i>       | G T T G C G A C T G C C T C A G G G T   | T T C C A G C T G A C G C A C T C G | C T T G G T G G A G G C | A C C A G |     |
| <i>A. duodenale</i>          | G A T G C G A C T G T C T T C A G G G C | T T C C A A T T G A C T C A C T C A | C T T G G A G G A G G T | A C C G   |     |

|                              | 490                                         | 500           | 510                     | 520               | 530     | 540 |
|------------------------------|---------------------------------------------|---------------|-------------------------|-------------------|---------|-----|
| <i>C. oncophora isotype1</i> | G A T C C G G T A T G G G C A C T T T G C T | T A T T T C A | A A A A T T C G T G A G | G A G T A C C C T | G A C A |     |
| <i>C. oncophora isotype2</i> | G A T C A G G A A T G G G A A C T T T A T T | G A T T G C T | A A G A T C C G T G A A | G A G T A C C C T | G A T A |     |
| <i>C. elegans tbb-1</i>      | G A T C C G G A A T G G G A A C C C T T C T | C A T C T C C | A A G A T T C G C G A G | G A A T T C C C A | G A T C |     |
| <i>C. elegans tbb-2</i>      | G A T C T G G A A T G G G A A C A C T T C T | C A T C T C C | A A A A T C C G C G A A | G A G T A C C C A | G A C A |     |
| <i>C. elegans ben-1</i>      | G A T C T G G A A T G G G A A C T C T T C T | C A T T T C G | A A A A T C C G T G A A | G A G T A T C C A | G A T A |     |
| <i>H. contortus isotype1</i> | G A T C T G G A A T G G G C A C T T T G T T | A A T T T C A | A A A A T T C G T G A A | G A G T A C C C T | G A T A |     |
| <i>H. contortus isotype2</i> | G A T C A G G A A T G G G A A C T C T G T T | G A T T G C T | A A G A T C C G T G A A | G A A T A T C C T | G A T A |     |
| <i>W. bancrofti</i>          | G T T C C G G T A T G G G A A C A T T G C T | G A T C T C G | A A A A T C C G T G A G | G A G T A T C C G | G A T C |     |
| <i>T. trichiura</i>          | G G A G T G G A A T G G G T A C G C T T C T | G A T A T C T | A A A A T T C G G G A A | G A G T A T C C T | G A C C |     |
| <i>T. circumcincta</i>       | G T T C G G G T A T G G G C A C T T T G C T | C A T C T C C | A A A A T T C G C G A G | G A G T A T C C G | G A T A |     |
| <i>O. volvulus</i>           | G T T C T G G T A T G G G A A C A T T G T T | G A T C T C G | A A A A T T C G T G A G | G A A T A T C C G | G A T C |     |
| <i>N. americanus</i>         | G A T C A G G A A T G G G A A C A C T T C T | T A T T T C T | A A A A T T C G G G A A | G A A T A C C C T | G A T A |     |
| <i>B. malayi</i>             | G T T C C G G C A T G G G A A C A T T G C T | G A T C T C G | A A A A T T C G T G A G | G A G T A T C C A | G A T C |     |
| <i>A. lumbricoides</i>       | G A T C T G G C A T G G G A A C G T T G C T | T A T T T C G | A A G A T C C G T G A A | G A A T A C C C C | G A C A |     |
| <i>A. duodenale</i>          | G A T C G G G T A T G G G A A C T C T C C T | C A T C T C T | A A A A T C C G C G A G | G A G T A C C C T | G A T A |     |

|                              | 550 |   |   |   | 560 |   |   |   | 570 |   |   |   | 580 |   |   |   | 590 |   |   |   |   |   |   |   |   |   |   |   |   |   |   |   |   |   |   |   |   |   |   |   |   |   |   |   |   |   |   |   |   |   |   |   |   |   |   |   |
|------------------------------|-----|---|---|---|-----|---|---|---|-----|---|---|---|-----|---|---|---|-----|---|---|---|---|---|---|---|---|---|---|---|---|---|---|---|---|---|---|---|---|---|---|---|---|---|---|---|---|---|---|---|---|---|---|---|---|---|---|---|
| <i>C. oncophora isotype1</i> | G   | A | A | T | T   | A | T | G | G   | C | T | T | C   | G | T | T | C   | T | C | T | G | T | T | G | T | T | C | C | T | T | C | A | C | C | A | A | A | G | G | T | C | T | C | C | G | A | C | A | C | C | G | T | T | G |   |   |
| <i>C. oncophora isotype2</i> | G   | G | A | T | C   | A | T | G | T   | C | T | T | C   | T | T | T | C   | T | C | A | G | T | G | G | T | G | C | C | T | T | C | A | C | C | C | A | A | A | G | G | T | T | T | C | C | G | A | T | A | C | C | G | T | A | G |   |
| <i>C. elegans tbb-1</i>      | G   | A | A | T | T   | A | T | G | T   | C | T | T | C   | T | C | T | T   | C | T | C | G | G | T | T | G | T | T | C | C | A | T | C | A | C | C | A | A | A | G | G | T | T | T | T | C | C | G | A | T | A | C | C | G | T | C | G |
| <i>C. elegans tbb-2</i>      | G   | A | A | T | C   | A | T | G | A   | G | C | T | C   | A | T | T | C   | T | C | G | G | T | T | G | T | A | C | C | A | T | C | G | C | C | A | A | A | G | G | T | G | T | T | C | C | G | A | C | A | C | A | G | T | G | T |   |
| <i>C. elegans ben-1</i>      | G   | A | A | T | T   | A | T | G | A   | G | T | T | C   | T | T | T | C   | T | C | G | G | T | T | G | T | T | C | C | G | T | C | G | C | C | A | A | A | G | G | T | C | T | T | C | C | G | A | C | A | C | A | G | T | C | G |   |
| <i>H. contortus isotype1</i> | G   | A | A | T | T   | A | T | G | G   | C | T | T | C   | G | T | T | C   | T | C | C | G | T | T | G | T | T | C | C | A | T | C | A | C | C | C | A | A | A | G | G | T | A | T | C | C | G | A | C | A | C | T | G | T | C | G |   |
| <i>H. contortus isotype2</i> | G   | A | A | T | T   | A | T | G | T   | C | A | T | C   | C | T | T | T   | C | T | C | A | G | T | G | G | T | A | C | C | T | T | C | A | C | C | A | A | A | G | G | T | T | T | T | T | C | C | G | A | T | A | C | T | G | T | C |
| <i>W. bancrofti</i>          | G   | A | A | T | T   | A | T | G | A   | G | C | T | C   | T | T | T | T   | T | C | G | G | T | T | G | T | G | C | C | G | T | C | G | C | C | A | A | A | G | T | A | T | C | T | C | A | G | A | T | A | C | T | G | T | G | T |   |
| <i>T. trichiura</i>          | G   | A | A | T | T   | A | T | G | A   | C | A | A | C   | T | T | T | T   | A | G | T | G | T | C | G | T | T | C | C | G | T | C | C | G | A | A | G | G | T | A | T | C | A | T | C | A | G | A | T | A | C | A | G | T | T | G |   |
| <i>T. circumcincta</i>       | G   | A | A | T | C   | A | T | G | G   | C | T | T | C   | A | T | T | T   | C | T | C | C | G | T | T | G | T | T | C | C | A | T | C | A | C | T | A | A | G | G | T | A | T | C | T | C | C | G | A | C | A | C | C | G | T | T | G |
| <i>O. volvulus</i>           | G   | A | A | T | T   | A | T | G | A   | G | C | T | C   | T | T | T | T   | T | C | G | G | T | T | G | T | A | C | C | A | T | C | A | C | C | C | A | A | A | G | T | A | T | T | C | A | G | A | T | G | T | T | G | T | A | T |   |
| <i>N. americanus</i>         | G   | A | A | T | C   | A | T | G | T   | C | C | T | C   | G | T | T | T   | T | C | C | G | T | T | G | T | A | C | C | C | T | C | G | C | C | A | A | A | G | G | T | T | T | T | C | C | G | A | C | A | C | T | G | T | G | G |   |
| <i>B. malayi</i>             | G   | A | A | T | T   | A | T | G | A   | G | C | T | C   | T | T | T | T   | T | C | G | G | T | T | G | T | G | C | C | A | T | C | G | C | C | A | A | A | G | T | A | T | C | T | A | G | A | T | G | T | T | G | T | G | T | G |   |
| <i>A. lumbricoides</i>       | G   | A | A | T | C   | A | T | G | A   | G | C | T | C   | G | T | T | C   | T | C | A | G | T | T | G | T | T | C | C | A | T | C | T | C | C | A | A | A | G | G | T | T | T | T | C | T | G | A | T | G | T | G | G | T | G | T |   |
| <i>A. duodenale</i>          | G   | G | A | T | T   | A | T | G | T   | C | C | T | C   | G | T | T | C   | T | C | T | G | T | T | G | T | C | C | C | T | C | A | C | C | A | A | A | G | G | T | T | T | T | C | C | G | A | C | A | C | C | G | T | G | G |   |   |

|                              | 600 |   |   |   | 610 |   |   |   | 620 |   |   |   | 630 |   |   |   | 640 |   |   |   |   |   |   |   |   |   |   |   |   |   |   |   |   |   |   |   |   |   |   |   |   |   |   |   |   |   |   |   |   |   |   |   |   |
|------------------------------|-----|---|---|---|-----|---|---|---|-----|---|---|---|-----|---|---|---|-----|---|---|---|---|---|---|---|---|---|---|---|---|---|---|---|---|---|---|---|---|---|---|---|---|---|---|---|---|---|---|---|---|---|---|---|---|
| <i>C. oncophora isotype1</i> | T   | G | G | A | A   | C | C | T | T   | A | C | A | A   | T | G | C | T   | A | C | T | T | T | C | T | G | T | T | C | A | C | C | A | A | C | T | G | G | T | A | G | A | A | A | T | A | C | C | G | A | T | G |   |   |
| <i>C. oncophora isotype2</i> | T   | T | G | A | A   | C | C | T | T   | A | C | A | A   | T | G | C | A   | C | G | C | T | T | T | C | T | G | T | G | C | A | C | C | A | A | C | T | T | G | T | G | G | A | A | C | A | C | C | G | A | T | G |   |   |
| <i>C. elegans tbb-1</i>      | T   | C | G | A | G   | C | C | G | T   | A | C | A | A   | T | G | C | A   | C | C | C | T | C | T | C | T | G | T | C | C | A | C | C | A | G | C | T | T | G | T | T | G | A | G | A | A | C | A | C | C | G | A | T | G |
| <i>C. elegans tbb-2</i>      | T   | A | G | A | A   | C | C | A | T   | A | C | A | A   | T | G | C | A   | C | C | C | T | C | T | C | C | G | T | C | C | A | C | C | A | G | C | T | T | G | T | T | G | A | G | A | A | C | A | C | C | G | A | T | G |
| <i>C. elegans ben-1</i>      | T   | C | G | A | G   | C | C | A | T   | A | C | A | A   | C | G | C | T   | A | C | T | C | T | T | T | C | T | G | T | C | A | C | C | A | G | C | T | C | G | T | T | G | A | A | A | T | A | C | C | G | A | T | G |   |
| <i>H. contortus isotype1</i> | T   | A | G | A | A   | C | C | C | T   | A | C | A | A   | T | G | C | T   | A | C | C | T | T | T | C | C | G | T | C | C | A | T | C | A | A | C | T | G | G | T | A | G | A | A | A | C | A | C | C | G | A | T | G |   |
| <i>H. contortus isotype2</i> | T   | G | G | A | A   | C | C | T | T   | A | C | A | A   | T | G | C | A   | C | C | T | A | T | C | T | G | T | C | C | A | T | C | A | A | C | T | G | G | T | G | A | A | A | T | A | C | T | G | A | C | G |   |   |   |
| <i>W. bancrofti</i>          | T   | G | G | A | A   | C | C | C | T   | A | C | A | A   | T | G | C | A   | C | A | T | A | T | C | A | G | T | C | C | A | C | C | A | A | C | T | A | G | T | T | G | A | A | A | C | A | C | A | C | G | A | T | G |   |
| <i>T. trichiura</i>          | T   | A | G | A | A   | C | C | A | T   | A | T | A | A   | T | G | C | A   | A | C | T | G | T | C | A | G | T | C | C | A | C | C | A | G | T | T | G | G | T | A | G | A | A | A | C | A | C | G | A | C | G |   |   |   |
| <i>T. circumcincta</i>       | T   | G | G | A | A   | C | C | T | T   | A | C | A | A   | T | G | C | A   | A | C | T | T | T | C | T | G | T | A | C | A | C | C | A | A | T | T | G | G | T | A | G | A | A | A | C | A | C | C | G | A | T | G |   |   |
| <i>O. volvulus</i>           | T   | G | G | A | A   | C | C | T | T   | A | T | A | A   | C | G | C | A   | A | C | A | T | T | A | T | C | A | G | T | G | C | A | T | C | A | A | T | A | G | T | T | G | A | A | A | C | A | C | T | G | A | C | G |   |
| <i>N. americanus</i>         | T   | T | G | A | G   | C | C | A | T   | A | C | A | A   | T | G | C | A   | A | C | T | C | T | C | T | G | T | T | C | A | C | C | A | G | T | T | A | G | T | T | G | A | G | A | A | T | A | C | A | G | A | T | G |   |
| <i>B. malayi</i>             | T   | G | G | A | A   | C | C | C | T   | A | C | A | A   | T | G | C | A   | A | C | T | A | T | C | A | G | T | C | C | A | C | C | A | A | C | T | A | G | T | T | G | A | A | A | C | A | C | T | G | A | C | G |   |   |
| <i>A. lumbricoides</i>       | T   | G | G | A | G   | C | C | T | T   | A | C | A | A   | C | G | C | A   | A | C | T | G | T | C | C | G | T | T | C | A | T | C | A | G | T | T | G | G | T | T | G | A | G | A | A | C | A | C | C | G | A | T | G |   |
| <i>A. duodenale</i>          | T   | G | G | A | G   | C | C | A | T   | A | C | A | A   | T | G | C | A   | A | C | T | C | T | C | T | G | T | G | C | A | C | C | A | G | C | T | G | G | T | T | G | A | G | A | A | T | A | C | A | G | A | T | G |   |

### Codon 200

|                              | 650       | 660                                                                                                 | 670                                                                       | 680     | 690 | 700 |
|------------------------------|-----------|-----------------------------------------------------------------------------------------------------|---------------------------------------------------------------------------|---------|-----|-----|
| <i>C. oncophora isotype1</i> | A A A C G | T T C T G T A T T G A T A A T                                                                       | G A A G C T C T G T A T G A T A T C T G C T T C C G C A C A               | T T G A |     |     |
| <i>C. oncophora isotype2</i> | A G A C A | T T C T G C A T T G A C                                                                             | A A C G A A G C A C T T T A C G A T C T T G C T T C C G A G A C A C T C A |         |     |     |
| <i>C. elegans tbb-1</i>      | A G A C T | T A C T G T A T C G A T A A C G A                                                                   | G G C T C T C T A C G A T A T C T G C T A C A G A A C T C T A             |         |     |     |
| <i>C. elegans tbb-2</i>      | A G A C C | T A C T G C A T T G A C                                                                             | A A C G A G G C C C T C T A C G A C A T C T G C T A C C G T A C C T C A   |         |     |     |
| <i>C. elegans ben-1</i>      | A G A C T | T T C T G C A T T G A C                                                                             | A A C G A G G C T C T T T A T G A T A T C T G C T T C A G A A C C C T C A |         |     |     |
| <i>H. contortus isotype1</i> | A A A C A | T T C T G T A T T G A C                                                                             | A A C G A A G C T C T G T A T G A T A T C T G C T T C C G C A C T T T G A |         |     |     |
| <i>H. contortus isotype2</i> | A A A C G | T T C T G T A T T G A T A A C G A A G C A C T C T A C G A C A T T T G C T T C C G T A C A C T G A   |                                                                           |         |     |     |
| <i>W. bancrofti</i>          | A A A C T | T T C T G C A T T G A T A A C G A G G C T T T G T A T G A C A T C T G C T T C C G A A C G T T G A   |                                                                           |         |     |     |
| <i>T. trichiura</i>          | A A A C A | T T C T G C A T A G A T A A T G A A G C G C T T T A C G A T A T T T G T T T C C G A A C T T T G A   |                                                                           |         |     |     |
| <i>T. circumcincta</i>       | A A A C A | T T C T G C A T C G A T A A T G A A G C T C T G T A C G A T A T C T G C T T C C G C A C C T T G A   |                                                                           |         |     |     |
| <i>O. volvulus</i>           | A A A C T | T T C T G C A T T G A T A A C G A A G C T T T A T A T G A C A T C T G C T T C C G A A C A T T G A   |                                                                           |         |     |     |
| <i>N. americanus</i>         | A G A C C | T T C T G T A T T G A T A A T G A A G C T T T G T A T G A T A T C T G C T T C C G A A C A T T G A   |                                                                           |         |     |     |
| <i>B. malayi</i>             | A A A C T | T T C T G C A T T G A T A A C G A G G C T T T T G T A T G A C A T C T G C T T C C G A A C G T T G A |                                                                           |         |     |     |
| <i>A. lumbricoides</i>       | A A A C C | T T C T G C A T T G A C A A T G A G G C T T T G T A C G A C A T C T G C T T C A G G A C C C T G A   |                                                                           |         |     |     |
| <i>A. duodenale</i>          | A G A C C | T T C T G T A T C G A T A A C G A G G C T C T G T A T G A T A T T T G C T T C C G A A C T T T G A   |                                                                           |         |     |     |

|                              | 710       | 720                                                               | 730                             | 740 | 750 |
|------------------------------|-----------|-------------------------------------------------------------------|---------------------------------|-----|-----|
| <i>C. oncophora isotype1</i> | A G C T C | A C A A A C C C A A C T T A T G G A G A T C T C A A C C A C C T A | G T G T C T G T C A C A A T G T |     |     |
| <i>C. oncophora isotype2</i> | A G C T T | A C T A A C C C T A C T T A C G G A G A T C T T A A C C A T C T T | G T A T C T G T G A C T A T G T |     |     |
| <i>C. elegans tbb-1</i>      | A G C T C | A C C A A C C C A A C A T A C G G A G A C C T G A A C C A T C T C | G T G T C T C T C A C A A T G T |     |     |
| <i>C. elegans tbb-2</i>      | A A C T C | A C C A A C C C A A C C T A C G G T G A T T T G A A C C A T C T T | G T A T C C C T C A C C A T G T |     |     |
| <i>C. elegans ben-1</i>      | A G C T T | T C A A A T C C A A C T T A T G G A G A T C T C A A T C A T C T T | G T T T C C G T T A C A A T G T |     |     |
| <i>H. contortus isotype1</i> | A A C T C | A C A A A T C C A A C C T A T G G A G A T C T C A A C C A C C T T | G T G T C T G T C A C A A T G T |     |     |
| <i>H. contortus isotype2</i> | A A C T T | A C T A A C C C A A C T T A T G G A G A T C T C A A C C A T C T G | G T A T C C G T G A C T A T G T |     |     |
| <i>W. bancrofti</i>          | A G T T G | G C A A A T C C A A C T T A C G G C G A C C T C A A C C A C T T G | G T G T C T G T G A C A A T G T |     |     |
| <i>T. trichiura</i>          | A G T T A | A C A A C A C C A A C T T A C G G A G A C T T A A A T C A T T T G | G T T T C G G C A A C C A T G T |     |     |
| <i>T. circumcincta</i>       | A A C T C | A C A A A T C C A A C T T A T G G C G A T C T C A A T C A C T T A | G T G T C T G T C A C A A T G T |     |     |
| <i>O. volvulus</i>           | A A T T G | A C G A A T C C A A C T T A T G G C G A T C T C A A T C A T T T G | G T A T C T G T G A C A A T G T |     |     |
| <i>N. americanus</i>         | A G C T T | A C G A A C C C A A C A T A T G G A G A T C T G A A T C A T C T T | G T G T C T G T A A C A A T G T |     |     |
| <i>B. malayi</i>             | A G T T G | G C A A A T C C A A C T T A C G G T G A C C T C A A C C A T T T G | G T G T C T G T G A C A A T G T |     |     |
| <i>A. lumbricoides</i>       | A G C T T | A C A A A T C C C A C A T A C G G A G A C C T C A A C C A T T T G | G T T T C T G T G A C T A T G T |     |     |
| <i>A. duodenale</i>          | A A C T C | A C A A A T C C A A C C T A T G G A G A T C T G A A C C A C C T C | G T G T C T G T A A C A A T G T |     |     |



|                              | 760           | 770           | 780       | 790       | 800                   | 810                               |               |
|------------------------------|---------------|---------------|-----------|-----------|-----------------------|-----------------------------------|---------------|
| <i>C. oncophora isotype1</i> | C C G G A G T | C A C G A C T | T G C C T | C C G A   | T T C C C T G G A C A | A C T A A A T G C T G A T C T     | T C G C A     |
| <i>C. oncophora isotype2</i> | C T G G A G T | A A C A A C G | T G C T   | A C G T   | T T C C C T G G A C A | A C T G A A T G C T G A T C T     | A C G T       |
| <i>C. elegans tbb-1</i>      | C T G G A G T | G A C T A C C | T G C C T | C C G C   | T T C C C T G G A C A | G C T G A A C G C T G A T C T     | T C G C A     |
| <i>C. elegans tbb-2</i>      | C C G G A G T | T A C C A C C | T G T C T | C C G A   | T T C C C A G G A C A | G C T C A A T G C C G A T C T     | C C G C A     |
| <i>C. elegans ben-1</i>      | C C G G A G T | C A C C A C G | T G C C T | C C G C   | T T C C C A G G A C A | A C T C A A T G C T G A T C T     | C C G C A     |
| <i>H. contortus isotype1</i> | C T G G T G T | C A C G A C C | T G C C T | T C G A   | T T C C C T G G A C A | G C T G A A T G C T G A T C T     | T C G C A     |
| <i>H. contortus isotype2</i> | C T G G A G T | A A C A A C A | T G C T   | T G C G A | T T C C C T G G A C A | A C T A A A T G C T G A T C T     | A C G T A     |
| <i>W. bancrofti</i>          | C T G G A G T | A A C A A C T | T G C T   | T A C G T | T T T C C T G G A C A | G T T G                           |               |
| <i>T. trichiura</i>          | C T G G A G T | A A C G A C A | T G C C T | A C G C   | T T T C C T G G T     | C A G T T G A A T G C T G A T C T | T T G C G G A |
| <i>T. circumcincta</i>       | C T G G A G T | G A C G A C C | T G C C T | T C G A   | T T C C C T G G A C A | G C T G A A T G C T G A T C T     | T C G C A     |
| <i>O. volvulus</i>           | C T G G A G T | C A C A A C A | T G C T   | T G C G T | T T T C C T G G A C A | G T T A A A T G C C G A T C T     | T C G T A     |
| <i>N. americanus</i>         | C T G G T G T | T A C T A C C | T G T C T | T C G C   | T T C C C C G G T     | C A G T T G A A T G C T G A T C T | T C G T A     |
| <i>B. malayi</i>             | C G G G A G T | A A C A A C T | T G C T   | T A C G T | T T C C C T G G A C A | G T T G A A C G C C G A T C T     | C C G T A     |
| <i>A. lumbricoides</i>       | C T G G C G T | C A C A A C G | T G C C T | G C G C   | T T C C C T G G C     | C A G C T G A A T G C A G A C T   | T G C G C A   |
| <i>A. duodenale</i>          | C C G G T G T | C A C T A C C | T G C C T | T C G C   | T T C C C T G G C     | C A G T T G A A T G C T G A T C T | C C G C A     |

|                              | 820           | 830                     | 840                       | 850                           | 860                   |           |
|------------------------------|---------------|-------------------------|---------------------------|-------------------------------|-----------------------|-----------|
| <i>C. oncophora isotype1</i> | A G T T G G C | C G T G A A C A T G G T | T C C A T T C C C         | T C G T C T T C A C T T C T T | T A T G C C           | C G G T T |
| <i>C. oncophora isotype2</i> | A A C T G G C | T G T C A A C A T G G T | G C C G T T C C C         | T C G C T T G C A T           | T T C T T C A T G C C | T G G A T |
| <i>C. elegans tbb-1</i>      | A G T T G G C | T G T C A A C A T G G T | T C C A T T C C C         | A C G T C T T C A T           | T T C T T C A T G C C | T G G A T |
| <i>C. elegans tbb-2</i>      | A G C T T G C | C G T C A A C A T G G T | T C C A T T C C C         | A C G T C T T C A C T T C T T | C A T G C C           | A G G A T |
| <i>C. elegans ben-1</i>      | A A C T T G C | A G T C A A C A T G G T | T C C A T T C C C         | A C G T C T T C A C T T C T T | T A T G C C           | A G G A T |
| <i>H. contortus isotype1</i> | A G T T A G C | C G T G A A C A T G G T | T C C A T T C C C         | T C G T C T T C A C T T C T T | C A T G C C           | C G G T T |
| <i>H. contortus isotype2</i> | A A C T G G C | T G T C A A C A T G G T | G C C C T T C C C         | T C G G C T A C A T           | T T C T T C A T G C C | T G G A T |
| <i>W. bancrofti</i>          |               |                         |                           |                               |                       |           |
| <i>T. trichiura</i>          | A G C T G G C | A G T C A A T A T G G T | G C C T T T T C C A C G T | T T G C A T                   | T T C T T T A T G C C | T G G C T |
| <i>T. circumcincta</i>       | A G T T A G C | C G T G A A C A T G G T | T C C A T T C C C         | T C G T C T T C A C T T C T T | C A T G C C           | A G G T T |
| <i>O. volvulus</i>           | A G C T C G C | T G T T A A T A T G G T | A C C A T T C C C         | A C G A T T G C A T           | T T C T T C A T G C C | A G G A T |
| <i>N. americanus</i>         | A G T T G G C | T G T C A A C A T G G T | T C C A T T C C C         | A C G T C T T C A C T T C T T | C A T G C C           | T G G T T |
| <i>B. malayi</i>             | A A C T T G C | C G T C A A T A T G G T | A C C A T T T C C A C G   | G T T G C A T                 | T T C T T T A T G C C | A G G A T |
| <i>A. lumbricoides</i>       | A A T T G G C | A G T C A A T A T G G T | G C C C T T C C C         | A C G T C T T C A C T T C T T | C A T G C C           | A G G T T |
| <i>A. duodenale</i>          | A A T T G G C | T G T A A A C A T G G T | T C C A T T C C C         | A C G T C T T C A C T T C T T | C A T G C C           | T G G A T |

870 880 890 900 910

*C. oncophora isotype1* T T G C C C C A T T G T C T G C T A A G G G T G C T C A A G C A T A T C G C G C T T C A A C T G T C G C T G

*C. oncophora isotype2* T T G C A C C A C T G T C A G C A A A A G G A G C T C A A G C C T A C C G T G C A C T T A C C G T T C T G

*C. elegans tbb-1* T C G C T C C A C T C T C C G C C A A G G G A G C T C A G G C T T A C C G T G C A T T G A C T G T C G C C G

*C. elegans tbb-2* T C G C A C C A C T T T C C G C C A A G G G A A C C C A G G C T T A C C G T G C C C T T A C C G T C G C C G

*C. elegans ben-1* T T G C T C C A T T G T C A G C T A A A G G A G C A C A A G C G T A C C G T G C A C T T A C G G T C G C C G

*H. contortus isotype1* T T G C T C C A C T G T C T G C A A A G G G T G C T C A A G C A T A T C G C G C T T C G A C A G T T G C T G

*H. contortus isotype2* T C G C A C C A C T A T C A G C A A A G G G A G C T C A A G C C T A C C G A G C A C T A A C T G T T C T G

*W. bancrofti*

*T. trichiura* T T G C G C C T C T A A C T T C A A G A G G A A G T C A G G G T T A T C G T G C T C T G A C G G T T C C T G

*T. circumcincta* T C G C C C A C T G T C T G C T A A G G G T G C T C A A G C G T A T C G C G C T T C A A C T G T C G C T G

*O. volvulus* T T G C T C C T C T C T C T G C T C G T G G T G C T G C T G C T T A T C G G G C A C T T A A T G T T G C T G

*N. americanus* T C G C T C C A C T C T C A G C G A A G G G T G C T C A A G C T A C C G T G C C T T A C T G T A G C T G

*B. malayi* T T G C T C C T C T C T C T G C T C G T G A T G C T G C T G C T T A T C G A G C T C C T C A A T G T T G C T G

*A. lumbricoides* T C G C T C C G T T G T C T G C T C G A G G A G C G G C T G C A T A C A G G C G C T C A A C G T C G C T G

*A. duodenale* T T G C T C C A C T T T C G G C T A A G G G T G C T C A G G C T T A C C G T G C T C T T A C T G T T G C C G

920 930 940 950 960 970

*C. oncophora isotype1* A G C T T A C A C A G C A A A A T G T T C G A T G C C A A G A A C A T G A T G G C T G C C T G T G A T C C T C

*C. oncophora isotype2* A G C T T A C A C A A C A G A T G T T C G A T G C T A A G A A C A T G A T G G C A G C T T G T G A T C C A C

*C. elegans tbb-1* A G C T T A C T C A A C A A A T G T T C G A C G C C A A G A A C A T G A T G G C T G C T T G C G A T C C A A

*C. elegans tbb-2* A G C T C A C C A A C A A A T G T T C G A T G C C A A G A A C A T G A T G G C T G C C T G T G A C C C A A

*C. elegans ben-1* A G C T T A C C C A G C A G A T G T T T G A C G C C A A G A A T A T G A T G G C T G C C T G T G A T C C G A

*H. contortus isotype1* A G C T T A C A C A G C A A A A T G T T C G A T G C A A A G A A C A T G A T G G C T G C C T G T G A T C C T C

*H. contortus isotype2* A G C T C A C G C A G C A G A T G T T C G A C G C A A A T A A C A T G A T G G C C G C T T G T G A T C C A C

*W. bancrofti*

*T. trichiura* A G C T T A C T C A G C A A A A T G T T C G A C G C A A A G A A C A T G A T G G C T G C T T G T G A T C C T C

*T. circumcincta* A G C T T A C A C A G C A A A A T G T T C G A T G C C A A G A A C A T G A T G G C T G C T T G T G A T C C T C

*O. volvulus* A G C T T A C T C A A C A G A T G T T T G A C G C C A A A A A T A T G A T G G C A G C A T G T G A T C C A C

*N. americanus* A A C T T A C T C A G C A G A T G T T C G A C G C A A A G A A C A T G A T G G C T G C G A T G C G A T C C A C

*B. malayi* A A C T T A C T C A A C A G A T G T T T G A T G C C A A A A A T A T G A T G G C A G C A T G T G A T C C G C

*A. lumbricoides* A A C T C A C T C A G C A G A T G T T C G A C G C C A A A A A C A T G A T G G C C G C T T G C G A T C C G C

*A. duodenale* A G C T C A C T C A G C A G A T G T T C G A T G C C A A G A A C A T G A T G G C C G C T T G T G A T C C T C

|                              | 980                                                                                                           | 990 | 1000 | 1010 | 1020 |
|------------------------------|---------------------------------------------------------------------------------------------------------------|-----|------|------|------|
| <i>C. oncophora isotype1</i> | G C C A T G G A C G C T A T C T T A C G G T G G C T G C C A T G T T C C G T G G T C G C A T G A G C A T G C   |     |      |      |      |
| <i>C. oncophora isotype2</i> | G A C A T G G C C G T T A T C T C A C C G T T G C G G C T A T G T T C A G A G G C C G T A T G A G C A T G C   |     |      |      |      |
| <i>C. elegans tbb-1</i>      | G A C A C G G A A G A T A C C T C A C C G T T G C T G C T A T G T T C C G T G G A C G C A T G T C C A T G A   |     |      |      |      |
| <i>C. elegans tbb-2</i>      | G A C A C G G A C G T T A C C T G A C C G T G G C C G C T A T G T T C C G T G G A C G C A T G T C G A T G A   |     |      |      |      |
| <i>C. elegans ben-1</i>      | G A C A C G G A C G T T A C C T G A C T G T A G C T G C A A T G T T C C G T G G A C G T A T G T C A A T G A   |     |      |      |      |
| <i>H. contortus isotype1</i> | G C C A T G G A C G T T A T C T T A C G G T A G C T G C T A T G T T C C G T G G A C G T A T G A G C A T G C   |     |      |      |      |
| <i>H. contortus isotype2</i> | G A C A C G G G C G C T A T C T T A C T G T T G C G G C A A T G T T C C G T G G T C G T A T G A G C A T G C   |     |      |      |      |
| <i>W. bancrofti</i>          |                                                                                                               |     |      |      |      |
| <i>T. trichiura</i>          | G T C A C G G G C G T T A C T T T A A C T G T A G C T G C A A T T T T C C G T G G G C G T A T G T C T A T G A |     |      |      |      |
| <i>T. circumcincta</i>       | G C C A C G G A C G C T A T C T G A C G G T G G C G G C C A T G T T C C G T G G T C G C A T G A G C A T G C   |     |      |      |      |
| <i>O. volvulus</i>           | G T C A T G G C C G T T A C T T A A C C G T A G C C G C T A T G T T C C G A G G C A G A A T G T C G A T G C   |     |      |      |      |
| <i>N. americanus</i>         | G A C A C G G G C G C T A T C T T A C C G T C G C T G C G A T G T T C C G C G G A A G A A T G A G C A T G C   |     |      |      |      |
| <i>B. malayi</i>             | G T C A T G G T C G T T A C C T A A C C G T A G C T G C C A T G T T C C G A G G T A G A A T G T C G A T G C   |     |      |      |      |
| <i>A. lumbricoides</i>       | G G C A C G G T C G T T A C C T T A C T G T G G C A G C C A T G T T C C G C G G A C G G A T G T C A A T G C   |     |      |      |      |
| <i>A. duodenale</i>          | G A C A T G G A C G C T A C C T C A C T G T T G C T G C T A T G T T C C G T G G A C G C A T G A G C A T G A   |     |      |      |      |

|                              | 1030                                                                                                          | 1040 | 1050 | 1060 | 1070 | 1080 |
|------------------------------|---------------------------------------------------------------------------------------------------------------|------|------|------|------|------|
| <i>C. oncophora isotype1</i> | G G G A A G T A G A C G A C C A G A T G A T G T C T G T A C A G A A C A A G A A C T C G T C A T A T T T C G   |      |      |      |      |      |
| <i>C. oncophora isotype2</i> | G C G A G G T C G A T G A T C A G A T G A T G T C T G T A C A A A C A A G A A C T C A T C A T A C T T C G     |      |      |      |      |      |
| <i>C. elegans tbb-1</i>      | G A G A G G T T G A C G A G C A G A T G C T C A A G T G T C C A G A A C A A G A A C T C C T C G T A C T T C G |      |      |      |      |      |
| <i>C. elegans tbb-2</i>      | G A G A G G T C G A C G A G C A A A T G C T C A A C G T T C A G A A C A A G A A C T C G T T C G T A C T T C G |      |      |      |      |      |
| <i>C. elegans ben-1</i>      | G A G A A G T C G A T G A T C A A A T G A T G A A T G T G C A G A A T A A G A A C T C T T C G T A T T T T G   |      |      |      |      |      |
| <i>H. contortus isotype1</i> | G A G A A G T A G A T G A T C A G A T G A T G T C C G T G C A G A A C A A G A A C T C A T C A T A T T T C G   |      |      |      |      |      |
| <i>H. contortus isotype2</i> | G T G A G G T T G A T G A C C A G A T G A T G T C T G T G C A A A A T A A G A A T T C G T C C T A C T T G     |      |      |      |      |      |
| <i>W. bancrofti</i>          |                                                                                                               |      |      |      |      |      |
| <i>T. trichiura</i>          | A G G A A G T T G A C G A G C A A A A T G C T G A A C G T T C A G A A C A A A A A C A A T G C C T A T T T T G |      |      |      |      |      |
| <i>T. circumcincta</i>       | G G G A A G T G G A C G A C C A A A A T G A T G T C C G T G C A G A A C A A G A A C T C G T C A T A C T T C G |      |      |      |      |      |
| <i>O. volvulus</i>           | G A G A A G T G G A T G A G C A A A A T G A T G C A A G T G C A G A A T A A G A A T T C A T C G T A C T T T G |      |      |      |      |      |
| <i>N. americanus</i>         | G G G A A G T C G A T G A C C A G A T G A T G T C A G T G C A A A C A A G A A T T C G T C T T A C T T T G     |      |      |      |      |      |
| <i>B. malayi</i>             | G G G A A G T A G A C G A G C A A A A T G A T G C A A G T A C A G A A T A A G A A T T C A T C G T A T T T C G |      |      |      |      |      |
| <i>A. lumbricoides</i>       | G C G A A G T G G A C G A G C A G A T G A T G C A G G T G C A G A A C A A G A A C T C G T C G T A C T T C G   |      |      |      |      |      |
| <i>A. duodenale</i>          | G G G A A G T T G A C G A C C A G A T G A C G T C A G T G C A G A A C A A G A A C T C G T C C T A C T T C G   |      |      |      |      |      |

*C. oncophora isotype1*  
*C. oncophora isotype2*  
*C. elegans tbb-1*  
*C. elegans tbb-2*  
*C. elegans ben-1*  
*H. contortus isotype1*  
*H. contortus isotype2*  
*W. bancrofti*  
*T. trichiura*  
*T. circumcincta*  
*O. volvulus*  
*N. americanus*  
*B. malayi*  
*A. lumbricoides*  
*A. duodenale*

1090                      1100                      1110                      1120                      1130

T T G A A T G G A T T C C A A A C A A C G T G A A A A A C T G C C G T T T G T G A T A T T C C T C C T C G T G  
 T T G A A T G G A T C C C T A A C A A T G T T A A A A C A G C C G T G T G C G A C A T C C C A C C G C G C G  
 T T G A A T G G A T T C C A A A C A A C G T C A A G A C T G C T G T G T G C G A C A T C C C A C C A C G T G  
 T C G A A T G G A T C C C G A A C A A C G T C A A G A C C G C C G T T T G T G A C A T C C C A C C A A G A G  
 T T G A A T G G A T T C C G A A T A A T G T G A A G A C T G C G G T C T G T G A T A T T C C A C C A C G T G  
 T G G A A T G G A T T C C A A A C A A C G T T A A G A C T G C C G T T T G T G A C A T T C C T C C T C G T G  
 T C G A A T G G A T T C C C A A C A A T G T A A A A A C A G C A G T A T G C G A T A T T C C A C C A C G C G

T G G A A T G G A T T C C A A A T A A C G T G A A G A C A G C T G T C T G T G A C A T A C C A C C C C G T G  
 T G G A A T G G A T T C C A A A C A A C G T A A A A A C C G C T G T T T G T G A C A T T C C T C C T C G T G  
 T T G A A T G G A T T C C A A A T A A C G T A A A A A C A G C A G T T T G C G A T A T T C C A C C A C G T G  
 T G G A A T G G A T T C C A A A C A A C G T T A A G A C A G C A G T G T G C G A T A T T C C T C C A A G A G  
 T T G A A T G G A T T C C A A A T A A C G T G A A G A C A A C T G T T T G C G A C A T T C C A C C A C G T G  
 T G G A G T G G A T C C C G A A C A A C G T T A A A A C T G C A G T C T G T G A C A T T C C G C G A G A G  
 T G G A A T G G A T T C C T A A C A A C G T A A A G A C C G C T G T G G A T A T T C C T C C A A G A G

*C. oncophora isotype1*  
*C. oncophora isotype2*  
*C. elegans tbb-1*  
*C. elegans tbb-2*  
*C. elegans ben-1*  
*H. contortus isotype1*  
*H. contortus isotype2*  
*W. bancrofti*  
*T. trichiura*  
*T. circumcincta*  
*O. volvulus*  
*N. americanus*  
*B. malayi*  
*A. lumbricoides*  
*A. duodenale*

1140                      1150                      1160                      1170                      1180

G A C T G A A G A T G G C T G C T A C T T T C G T T G G T A A C T C G A C T G C G A T C C A A G A G C T G T  
 G A T T G A A A A T G G C T G C T A C T T T C G T T G G A A A C T C G A C A G C A A T C C A A G A A C T G T  
 G A C T C A A G A T G G C T G C C A C C T T C G T C G G A A A C T C C A C T G C T A T C C A G G A G C T C T  
 G A C T C A A G A T G G C T G C C A C C T T C G T T G G A A A C T C G A C C G C T A T C C A A G A G C T T T  
 G G C T C A A G A T G T C G G C C A C T T T T A T T G G A A A C T C G A C A G C T A T T C A G G A G T T G T  
 G A C T G A A A A T G G C G G C T A C C T T T C A T T G G T A A C T C G A C T G C T A T C C A G G A G C T G T  
 G T T T G A A A A T G G C T G C C A C C T T T T G T T G G A A A C T C G A C A G C A A T C C A A G A A C T G T

G A C T G A A G A T G T C G G C T A C G T T C A T T G G A A A T T C A A C T G C T A T T C A A G A A T T G T  
 G A T T G A A A A T G G C T G C T A C C T T T T G T T G G T A A C T C A A C T G C C A T C C A A G A G C T G T  
 G G T T G A A G A T G A G C G C A A C A T T C A T C G G A A A T A C A A C A G C C A T A C A A G A A C T T T  
 G T C T G A A A A T G G C C G C T A C A T T T G T T G G A A A C T C T A C T G C C A T T C A G G A G T T G T  
 G A T T A A A G A T G A G C G C A C A T T T A T T G G A A A T A C A A C A G C T A T A C A A G A A C T T T  
 G G T T G A A G A T G A G C G C G A C C T T C A T C G G A A A T A C A A C A G C C A T C C A A G A A C T T T  
 G A T T G A A A A T G G C C G C C A C C T T C G T T G G A A A C T C G A C T G C C A T C C A A G A G C T G T

1190 1200 1210 1220 1230 1240  
*C. oncophora isotype1* T C A A G C G T A T T T C G G A G C A G T T C A C A G C T A T G T T C C G A C G C A A A G C T T T C C T T C  
*C. oncophora isotype2* T C A A G C G C A T C T C A G A A C A A T T C A C T G C C A T G T T C C G T C G C A A A G C T T T C T T A C  
*C. elegans tbb-1* T C A A G C G T A T C T C G G A G C A A T T C A C C G C C A T G T T C C G C A G A A A G G C C T T C C T T C  
*C. elegans tbb-2* T C A A G C G T A T C T C A G A G C A G T T C A C T G C T A T G T T C C G C C G C A A A G G C T T T C C T C C  
*C. elegans ben-1* T C A A G A G A A T C T C T G A A C A A T T T A C A G C A A T G T T C C G C C G C A A A G G C T T T C C T C C  
*H. contortus isotype1* T C A A G C G T A T T T C G G A G C A A T T C A C T G C C A T G T T C C G A C G C A A A G C T T T C C T T C  
*H. contortus isotype2* T C A A G C G T A T A T C A G A G C A G T T T A C T G C T A T G T T C C G T C G T A A A G C C T T T C T T A C  
*W. bancrofti*  
*T. trichiura* T T A A A C G C A T A T C T G A A C A A T T C A C A G C G A T G T T T C G C C G T A A A G C T T T T C T C C  
*T. circumcincta* T C A A G C G T A T T T C G G A G C A G T T C A C A G C T A T G T T C C G G C G C A A A G G C T T T C C T C C  
*O. volvulus* T C A A A C G C A T T T C T G A G C A G T T C A C T G C C A T G T T C C G A C G T A A A G C A T T C T T G C  
*N. americanus* T C A A G C G T A T T T C G G A G C A G T T T A C T G C C A T G T T C C G C C G C A A A G C C T T C T T A C  
*B. malayi* T C A A G C G A A T T T C G A A C A A T T T A C T G C C A T G T T C C G A C G T A A A G C A T T C T T G C  
*A. lumbricoides* T C A A A C G A A T C T C G G A G C A G T T T A C T G C C A T G T T C C G C C G C A A A G C G T T T T T G C  
*A. duodenale* T C A A G C G T A T C T C C G A G C A A T T C A C C G C T A T G T T C C G C C G C A A A G C C T T C T T G C

1250 1260 1270 1280 1290  
*C. oncophora isotype1* A T T G G T A C A C T G G T G A G G G T A T G G A C G A A A T G G A G T T C A C T G A A G C T G A G T C G A  
*C. oncophora isotype2* A T T G G T A C A C T G G T G A G G G T A T G G A C G A A A T G G A A T T C A C T G A A G C C G A A T C G A  
*C. elegans tbb-1* A T T G G T A C A C T G G T G A G G G T A T G G A C G A G A T G G A G T T C A C C G A G G C T G A A A G C A  
*C. elegans tbb-2* A T T G G T A C A C T G G A G A A G G A A T G G A C G A G A T G G A G T T C A C C G A A G C C G A G A G C A  
*C. elegans ben-1* A T T G G T A T A C T G G C G A A G G A A T G G A C G A G A T G G A A T T C A C T G A A G C T G A G A G T A  
*H. contortus isotype1* A T T G G T A C A C T G G T G A G G G T A T G G A C G A A A T G G A G T T C A C A G A A G C T G A G T C G A  
*H. contortus isotype2* A T T G G T A C A C T G G C C A A G G T A T G G A C G A A A T G G A A T T C A C T G A A G C C G A A T C G A  
*W. bancrofti*  
*T. trichiura* A T T G G T A T A C G G G G A G G G T A T G G A C G A A A T G G A G T T T A C A G A A G C A G A A A G T A  
*T. circumcincta* A T T G G T A C A C T G G T G A G G G T A T G G A C G A A A T G G A A T T C A C A G A A G C T G A G T C G A  
*O. volvulus* A T T G G T A T A C T G G A G A A G G T A T G G A T G A A A T G G A A T T C A C T G A A G C A G A A A G T A  
*N. americanus* A T T G G T A C A C C G G T G A A G G A A T G G A T G A G A T G G A A T T C A C G G A G G C A G A G T C T A  
*B. malayi* A T T G G T A T A C T G G C G A A G G T A T G G A T G A A A T G G A A T T C A C G G A A G C G G A G A G T A  
*A. lumbricoides* A C T G G T A C A C C G G A G A A G G A A T G G A C G A G A T G G A A T T C A C A G A A G C G G A G A G C A  
*A. duodenale* A T T G G T A C A C T G G T G A G G G T A T G G A T G A G A T G G A G T T C A C T G A A G C C G A A T C C A

1300 1310 1320 1330 1340 1350  
*C. oncophora isotype1* A C A T G A A C G A T C T T A T C T C C G A A T A C C A A C A A G T A C C A G G A A G C C A C C G C T G A C G  
*C. oncophora isotype2* A T A T G A A T G A T C T T G T G T C T G A A T A T C A A C A A T A C C A A G A A G C G A C T G C T G A T G  
*C. elegans tbb-1* A C A T G A A C G A C T T G A T C T C G G A G T A C C A A C A A T A C C A G G A A G C T A C C G C C G A A G  
*C. elegans tbb-2* A C A T G A A C G A T C T C A T C T C A G A A T A C C A A C A A T A C C A A G A A G C A A C T G C C G A A G  
*C. elegans ben-1* A T A T G A A C G A T C T T G T C T C A G A A T A C C A G C A A T A C C A G G A A G C A A C T G C A G A G G  
*H. contortus isotype1* A C A T G A A T G A C C T T A T C T C C G A A T A C C A G C A G T A C C A G G A A G C T A C C G C T G A C G  
*H. contortus isotype2* A T A T G A A T G A T C T T G G T A T C T G A G T A C C A A C A A T A T C A A G A G G C A A C T G C T G A T G  
*W. bancrofti*  
*T. trichiura* A C A T G A A C G A T C T A G T T A G C G A A T A T C A A C A A T A T T C A G G A G G C C A C A G T T G A A G  
*T. circumcincta* A C A T G A A T G A T C T T A T C T C T G A G T A C C A A C A A G T A C C A G G A G G C C A C C G C T G A C G  
*O. volvulus* A C A T G A A T G A T T T G G T T T C T G A A T A T C A G C A G T A T C A A G A T G C A A C G G C T G A T G  
*N. americanus* A C A T G A A T G A T C T C A T T T C G G A A T A C C A G C A A T A T C A G G A A G C T A C C G C T G A T G  
*B. malayi* A T A T G A A T G A C T T G G T G T C C G A A T A T C A A C A A T A T C A A G A T G C G A C G G C T G A T G  
*A. lumbricoides* A C A T G A A T G A T G T G G T C T C C G A G T A C C A G C A G T A T C A A G A C G C C A C T G C T G A A G  
*A. duodenale* A C A T G A A T G A T C T C A T C T C G G A A T A T C A G C A A C A T C A G G A G G C T A C C G C C G A C G

1360 1370 1380 1390 1400  
*C. oncophora isotype1* A T A T G G G C G A T C T C G A T G C A G A A G G C G C A G A A G A G C C G T A C C C C G A G G A G T A G T  
*C. oncophora isotype2* A T G A T G G C G A A G T A G A A G G A A C C G T T G A G A A C G A C A C C T A C G C A G A G G A G T A G A  
*C. elegans tbb-1* A C G A G C C A C T - - - C G A C G A G T T C G C C G G A G A A G - - - G G G A G A C A T A C G A G T C T G  
*C. elegans tbb-2* A C G A C G T C G A - - - C G G A T A C G C T G A G G G A G A A G C T G G A G A G A C T T A C G A A T C G G  
*C. elegans ben-1* A A G A T G G A G A A C T T G A T G G A A C T G A T G G A G A T G C T G A A T A G  
*H. contortus isotype1* A T A T G G G C G A T C T C G A T G C A G A A G G T G G A G A A G A G G C A T A T C C C G A G G A G T A A T  
*H. contortus isotype2* A T G A G G G T G A A A T G G A A G G T G C C G T T G A A A A C G A C A C G T A T G C A G A G G A G T A A A  
*W. bancrofti*  
*T. trichiura* A T G A A G A C T T - - - C G A A G A A G A A G A A G G C G A T T A C G A A C G T G A A T G A  
*T. circumcincta* A T A T G G G C G A T C T C G A T G C A G A A G G T G C A G A A G A G C C G T A C C C C G A G G A G T A A  
*O. volvulus* A T G A A G C T G A T C T - - - T C A G G A A G G T G A A T C G G A A T A C A T T G A A C A G G A A G A G T  
*N. americanus* A C A T G G G C G A T C T C G A T G C G G A A G G T G G C G A G G A G G C C T A C C C A G A G G A G T A G  
*B. malayi* A A G A A G G T G A T C T - - - T C A G G A A G G T G A A T C G G A A T A C A T T G A A C A G G A A G A G T  
*A. lumbricoides* A T G A G G G T G A A T T G G A C C A C G A A G G C G A G G C C G A G T A T A C C G A G C A A G A G G A G G  
*A. duodenale* A C A T G G G T G A T C T C G A T G C G G A A G G C G G C G A G G A G G C T T A C C C C G A G G A G T A G

*C. oncophora isotype1* G - A T C T **A** C C C **G** T G T T G C G **C T** G **T** - - - T T T **T** T C T G **T** G **T** C A A **T G C** G A A A **T A C** A C **A T T**  
*C. oncophora isotype2* **A** - A A G **C A A** T T **G** C C C A **A T** T **C A C** T - **A T** G C **A T** C T C A **T T T T** T T **T G C** A G **C** T A T C A **T A C** T  
*C. elegans tbb-1* **A** G C A A T **A A** T C T G T G T **A T** C A A T C A C T A A **A T** T A T C C T G C C C C **G** T T T **C** G **T A A** T T T C C  
*C. elegans tbb-2* **A** G C A A T **A A** A T **G** C A A G **A T** C **C T** T **T** C **A** A G C **A T** T C C C **T T** C **T** T C **T** C T A T **C** A C T C T **T** C **T T**  
*C. elegans ben-1*  
*H. contortus isotype1* G - A T C **C A** C A A A - G T T G **T** G **C T** C **T** - - - T T T **T** C C T G **T** G **T** C A A **T G C** G A A A **T A C** A C **A T T**  
*H. contortus isotype2* G **G** A A G **C A** T C T **G** C C C A **A** C T **C** A T **T** **A T** G C **A T** C T C A **T T** C **T** T - - **G C** G G **C** T A T T G **T A T T**  
*W. bancrofti*  
*T. trichiura*  
*T. circumcincta*  
*O. volvulus* **A** A  
*N. americanus*  
*B. malayi* G A G C A **C A A** A G T G T C A G C T T **T** G **T** G **A** A A A **A** A G A A C **T T T T** A C A **G** T A T T T **T A** T T **T A T T** C  
*A. luntricoides* **A** G T G A  
*A. duodenale*

*C. oncophora isotype1* **G** G **T T** G C G T **T**  
*C. oncophora isotype2* **G** C A **T** A C G T **T G T** A A **A** A G **T T T C** T C T G A **A** C G G C **T** G T **T** C T C A A A G C A C T **T T** C **T A** T **T** T G  
*C. elegans tbb-1* T G **T A C A** - A **T G** A T C **T T** T **T** **C T T T** C G C C C **A C** **T C C C A A T A** **T T T T T** A **T** G A C **T** C G A **A** T G A  
*C. elegans tbb-2* T C **T T** T T T G **T** C A A A **A** A A **T T** C **T** C T C G C T **A A** **T T T** A T **T T** G C **T T T T** T **T** A A **T G T** **T A** T **T A** T  
*C. elegans ben-1*  
*H. contortus isotype1* **G** G **T T** G C G T **T G T** G T **A T** G G **T** G **T T** A T T A **A A** G C **T T** G C **T** A A **T T** G A **T** A A A G **T T** A A T G A A G  
*H. contortus isotype2* **G** C G C G T A C **T G**  
*W. bancrofti*  
*T. trichiura*  
*T. circumcincta*  
*O. volvulus*  
*N. americanus*  
*B. malayi* **G** T C **T** T T T C C A **T** G T T **T** **T A** **T G** **T** T G T T **A** C A **T T T** T A **T T T** T **T G** **T T** A C **T** C G C **T** T **T** C G A C A  
*A. luntricoides*  
*A. duodenale*

1520 1530 1540 1550 1560  
*C. oncophora isotype1*  
*C. oncophora isotype2* T G A T T T T A T T A T G A T C T A T T C T T G C T G C T A A T T A T T T C T T C G C G A G C T T C C C G A  
*C. elegans tbb-1* A C G A T G A T T A A T T T  
*C. elegans tbb-2* T T T A T G A C T T T T T A T A G T C A C T G A A A A G T T T G C A T C T G A G T G A A G T G A A T G C T A  
*C. elegans ben-1*  
*H. contortus isotype1* T T T A A A A A A A A A A A A G A A  
*H. contortus isotype2*  
*W. bancrofti*  
*T. trichiura*  
*T. circumcincta*  
*O. volvulus*  
*N. americanus*  
*B. malayi* T A T A T T A G C A A A T T T A A A G A A T T A T A G C G A C A A A T C T C A T T G T T G T A C T T C T C  
*A. lumbricoides*  
*A. duodenale*

1570 1580 1590 1600 1610 1620  
*C. oncophora isotype1*  
*C. oncophora isotype2* T G A G T T T G A T A A A G C G A A T G A T C A G G C T G A  
*C. elegans tbb-1*  
*C. elegans tbb-2* T C A A A A T G T G A T T C T G T C T G A T G T A C T T T C A C A A T C T C T T C A A T T C C A T T T T  
*C. elegans ben-1*  
*H. contortus isotype1*  
*H. contortus isotype2*  
*W. bancrofti*  
*T. trichiura*  
*T. circumcincta*  
*O. volvulus*  
*N. americanus*  
*B. malayi* A A T A A A T T A C  
*A. lumbricoides*  
*A. duodenale*



1630 1640 1650 1660 1670

*C. oncophora isotype1*  
*C. oncophora isotype2*  
*C. elegans tbb-1*  
*C. elegans tbb-2*  
*C. elegans ben-1*  
*H. contortus isotype1*  
*H. contortus isotype2*  
*W. bancrofti*  
*T. trichiura*  
*T. circumcincta*  
*O. volvulus*  
*N. americanus*  
*B. malayi*  
*A. lumbricoides*  
*A. duodenale*

**G A A G T G C T T T A A A C C C G A A A G G T T G A G A A A A A T G C G A G C G C T C A A A T A T T T G T A**

1680 1690 1700 1710 1720

*C. oncophora isotype1*  
*C. oncophora isotype2*  
*C. elegans tbb-1*  
*C. elegans tbb-2*  
*C. elegans ben-1*  
*H. contortus isotype1*  
*H. contortus isotype2*  
*W. bancrofti*  
*T. trichiura*  
*T. circumcincta*  
*O. volvulus*  
*N. americanus*  
*B. malayi*  
*A. lumbricoides*  
*A. duodenale*

**T T G T G T T C G T T G A G T G A C C C A A C A A A A A G A G G A A A**

The alignment shows a high conservation in all beta-tubulin cDNA sequences. The square shows codon 200 where “TTC” is present in all sequences except for *C. elegans tbb-1* and *tbb-2*
